1 **Missense Mutations in the Human Nanophthalmos Gene *TMEM98***  
2 **Cause Retinal Defects in the Mouse**

3

4 Sally H. Cross<sup>1\*</sup>, Lisa Mckie<sup>1</sup>, Margaret Keighren<sup>1</sup>, Katrine West<sup>1</sup>, Caroline Thaug<sup>2,3</sup>, Tracey  
5 Davey<sup>4</sup> and Ian J. Jackson<sup>1</sup>

6 <sup>1</sup>MRC Human Genetics Unit, MRC Institute of Genetics and Molecular Medicine, University  
7 of Edinburgh, Crewe Road, Edinburgh EH4 2XU, United Kingdom

8 <sup>2</sup>Moorfields Eye Hospital NHS Foundation Trust, 162 City Road, London EC1V 2PD, United  
9 Kingdom.

10 <sup>3</sup>UCL Institute of Ophthalmology, 11-43 Bath Street, London EC1V 9EL, United Kingdom.

11 <sup>4</sup>Electron Microscopy Research Services, Newcastle University, Newcastle NE2 4HH, United  
12 Kingdom.

13 \*corresponding author Email: [sally.cross@igmm.ed.ac.uk](mailto:sally.cross@igmm.ed.ac.uk) Tel: +44 131 651 8500

14

15 Running Title: *TMEM98* Nanophthalmos Mutations in the Mouse

16 Grant information: Funded by the MRC University Unit award to the MRC Human Genetics  
17 Unit

18 **ABSTRACT**

19 **PURPOSE.** We previously found a dominant mutation, *Rwhs*, causing white spots on the  
20 retina accompanied by retinal folds. Here we identify the mutant gene to be *Tmem98*. In  
21 humans, mutations in the orthologous gene cause nanophthalmos. We modelled these  
22 mutations in mice and characterised the mutant eye phenotypes of these and *Rwhs*.

23 **METHODS.** The *Rwhs* mutation was identified to be a missense mutation in *Tmem98* by  
24 genetic mapping and sequencing. The human *TMEM98* nanophthalmos missense mutations  
25 were made in the mouse gene by CRISPR-Cas9. Eyes were examined by indirect  
26 ophthalmoscopy and the retinas imaged using a retinal camera. Electroretinography was  
27 used to study retinal function. Histology, immunohistochemistry and electron microscopy  
28 techniques were used to study adult eyes.

29 **RESULTS.** An I135T mutation of *Tmem98* causes the dominant *Rwhs* phenotype and is  
30 perinatally lethal when homozygous. Two dominant missense mutations of *TMEM98*, A193P  
31 and H196P are associated with human nanophthalmos. In the mouse these mutations cause  
32 recessive retinal defects similar to the *Rwhs* phenotype, either alone or in combination with  
33 each other, but do not cause nanophthalmos. The retinal folds did not affect retinal function  
34 as assessed by electroretinography. Within the folds there was accumulation of disorganised  
35 outer segment material as demonstrated by immunohistochemistry and electron microscopy,  
36 and macrophages had infiltrated into these regions.

37 **CONCLUSIONS.** Mutations in the mouse orthologue of the human nanophthalmos gene  
38 *TMEM98* do not result in small eyes. Rather, there is localised disruption of the laminar  
39 structure of the photoreceptors.

40

41

## 42 INTRODUCTION

43 There are a range of genetic disorders which present with a reduced eye size. In  
44 microphthalmia the reduced size is associated with additional developmental eye defects,  
45 such as coloboma, and may also include developmental defects in other organs. In some  
46 cases there is an overall size reduction without developmental defects. These comprise a  
47 spectrum of increasing severity termed simple microphthalmia, posterior microphthalmia and  
48 nanophthalmos, in which the short axial length results in high hyperopia <sup>1,2</sup>. Nanophthalmos,  
49 in which eye length is reduced by 30% or more, can be associated with other ocular  
50 features, notably a thickened choroid and sclera, as well as a high incidence of glaucoma,  
51 corneal defects, vascular defects and a range of retinal features including retinitis  
52 pigmentosa, retinoschisis, retinal detachments and retinal folds.

53 A number of genes have been found to be associated with nanophthalmos <sup>2</sup>. Patients with  
54 heterozygous or homozygous mutations in the *BEST1* gene can have a range of defects <sup>3</sup>.  
55 *BEST1* encodes the bestrophin-1 protein, a transmembrane protein located in the  
56 basolateral membrane of the retinal pigment epithelium (RPE) <sup>4</sup>. The predominant disease  
57 resulting from mutations in *BEST1* is Best vitelliform macular dystrophy, in which subretinal  
58 lipofuscin deposits precede vision defects <sup>5</sup>. These patients in early stages have a normal  
59 electroretinogram (ERG) but have a defect in electrooculography (EOG) indicative of a  
60 abnormality in the RPE. This can progress to retinitis pigmentosa. Five families have been  
61 reported with dominant vitreoretinopathopathy and nanophthalmos due to three different  
62 missense mutations in *BEST1*. Each mutant allele can produce two isoforms, one containing  
63 a missense mutation and one containing an in-frame deletion <sup>6</sup>. Similar rare associations  
64 have been seen for mutations in the *CRB1* gene that encodes an apical transmembrane  
65 protein important for determining cell polarity in photoreceptors <sup>7</sup>. *CRB1* mutations are most  
66 frequently found associated with recessive retinitis pigmentosa or with Leber congenital  
67 amaurosis and the disease phenotype observed in patients is very variable suggestive of the  
68 influence of genetic modifiers <sup>8,9</sup>. However, in two cases, both involving consanguineous  
69 families, the retinal dystrophy is associated with nanophthalmos <sup>10,11</sup>.

70 In contrast to *BEST1* and *CRB1*, mutations in three other genes lead to more frequent  
71 associations with nanophthalmos. Several families with nanophthalmos have been found to  
72 have clear loss of function mutations in both alleles of the gene encoding membrane-type  
73 frizzled related protein, *MFRP*, that is expressed principally in the RPE and ciliary body <sup>12</sup>.

74 Homozygous loss of function mutations in *MFRP* have been found in other individuals with  
75 posterior microphthalmia plus retinitis pigmentosa, foveoschisis and drusen, indicating likely  
76 genetic background effects on the severity or range of the disease<sup>13-15</sup>. A second autosomal  
77 recessive nanophthalmos gene is *PRSS56*, encoding a serine protease. Families with  
78 biallelic mutations in this gene have been characterised, some of whom have posterior  
79 microphthalmia whilst others have nanophthalmos<sup>16-18</sup>. There is no apparent genotype-  
80 phenotype correlation; there are patients with homozygous frameshift mutations with either  
81 condition. Intriguingly, association of variants at *PRSS56* with myopia has been reported in  
82 genome-wide association studies<sup>19, 20</sup>.

83 Most recently three families have been characterised in which heterozygous mutations in  
84 *TMEM98* are segregating with nanophthalmos. Two families have missense mutations, the  
85 third has a 34bp deletion spanning a splice site which could lead to production of a  
86 potentially functional protein with an internal deletion<sup>21, 22</sup>. Caution in assigning a role for  
87 *TMEM98* in nanophthalmos has been raised by findings in another study where different  
88 heterozygous missense mutations in *TMEM98* were found in patients with high myopia and  
89 cone-rod dystrophy<sup>23</sup>.

90 Mouse models with mutations in most of these genes have been analysed. Mice which have  
91 targeted disruption of the *Best1* gene do not recapitulate the human bestrophinopathy  
92 phenotype or have only an enhanced response in EOG (indicative of a defect in the RPE)<sup>24</sup>,  
93<sup>25</sup>. However, when the common human mutation, W93C, is engineered into the mouse gene,  
94 both heterozygous and homozygous mice show a distinctive retinal pathology of fluid or  
95 debris filled retinal detachments which progress with age<sup>26</sup>. Spontaneous and targeted  
96 mutations in mouse *Crb1* have been characterised, and they show similar, though not  
97 identical, recessive retinal phenotypes that had variable ages of onset<sup>27-29</sup>. The defects  
98 found are focal. Folds and rosettes appear in the photoreceptor layer that are visualised as  
99 white patches on retinal imaging. In a complete loss-of-function allele and the frameshift  
100 allele *Crb1<sup>rd8</sup>* the folds and rosettes are adjacent to discontinuities in the outer (external)  
101 limiting membrane (OLM) accompanied by loss of adherens junctions, and within them the  
102 photoreceptors, separated from the RPE, show degeneration<sup>27, 28</sup>. In mice engineered to  
103 carry a missense mutation, *Crb1<sup>C249W/-</sup>*, that causes retinitis pigmentosa in humans, although  
104 the OLM appears intact, retinal degeneration still occurs, albeit later than in the other models  
105<sup>29</sup>. Similar to the human phenotype the extent of the retinal spotting observed in *Crb1*  
106 mutants is strongly affected by the genetic background.

107 Two lines of mice with spontaneous mutations in *Mfrp* have been described<sup>30-32</sup>. These do  
108 not recapitulate the nanophthalmic phenotype observed in humans. Instead both have the  
109 same recessive phenotype of white spots on the retina, which correlate with abnormal cells  
110 below the retina that stain with macrophage markers, and progress to photoreceptor  
111 degeneration. For the *Mfrp*<sup>rdx</sup> mutation, atrophy of the RPE was reported<sup>31</sup> and for *Mfrp*<sup>rd6</sup> a  
112 modest ocular axial length reduction from about 2.87 to 2.83 mm was reported although  
113 apparently not statistically significant<sup>33</sup>. A screen for mice with increased intraocular  
114 pressure (IOP) found a splice mutation in the *Prss56* gene predicted to produce a truncated  
115 protein<sup>17</sup>. The increased IOP was associated with a narrow or closed iridocorneal angle,  
116 analogous to that seen in human angle closure glaucoma. In addition these mice have eyes  
117 that are smaller than littermates, although the size reduction is variable and slight, ranging  
118 from 0 to 10% decrease in axial length. Reduction in axial length only becomes statistically  
119 significant after post-natal day seven. More recently it has been shown that mice deficient  
120 for *Prss56* have eyes with a decreased axial length and hyperopia<sup>34</sup>.

121 To date no mouse models of *TMEM98* have been reported. We describe here  
122 characterisation of a mouse mutation in *Tmem98*, which results in a dominant phenotype of  
123 retinal folds and rosettes. In addition we engineer the two nanophthalmos-associated  
124 missense mutations of *TMEM98* into the mouse gene and show that these mice also, when  
125 homozygous or when compound heterozygous, have the same retinal fold and rosette  
126 phenotype.

127

## 128 **MATERIALS AND METHODS**

### 129 **Mice**

130 All mouse work was carried out in compliance with UK Home Office regulations under a UK  
131 Home Office project licence and experiments adhered to the ARVO Statement for the Use of  
132 Animals in Ophthalmic and Vision Research. Clinical examinations were performed as  
133 previously described<sup>35</sup>. Fundus imaging was carried out as described<sup>36</sup>. Mice carrying a  
134 targeted knockout-first conditional-ready allele of *Tmem98*, *Tmem98*<sup>tm1a(EUCOMM)Wtsi</sup> (hereafter  
135 *Tmem98*<sup>tm1a</sup>), were obtained from the Sanger Institute<sup>37</sup>. *Tmem98*<sup>tm1a/+</sup> mice were crossed  
136 with mice expressing Cre in the germ-line to convert this 'knockout-first' allele to the reporter  
137 knock-out allele *Tmem98*<sup>tm1b(EUCOMM)Wtsi</sup> (hereafter *Tmem98*<sup>tm1b</sup>). In this allele the DNA  
138 between the loxP sites in the targeting cassette which includes the neo selection gene and

139 the critical exon 4 of *Tmem98* is deleted. To create the *Tmem98*<sup>H196P</sup> allele the CRISPR  
140 design site [www.crispr.mit.edu](http://www.crispr.mit.edu) was used to design guides and the selected guide oligos  
141 ex7\_Guide1 and ex7\_Guide2 (Table 1) were annealed and cloned into the *Bbs I* site of the  
142 SpCas9 and chimeric guide RNA expression plasmid px330<sup>38</sup> (pX330-U6-Chimeric\_BB-  
143 CBh-hSpCas9 was a gift from Feng Zhang (Addgene plasmid #42230,  
144 <https://www.addgene.org/>)). Following pronuclear injection of this plasmid along with repair  
145 oligo H196P (Table 1) the injected eggs were cultured overnight to the 2-cell stage and  
146 transferred into pseudopregnant females. To create the *Tmem98*<sup>A193P</sup> allele Edit-R crRNA  
147 (sequence 5'- CCAAUCACUGUCUGCCGCUG-3') (Dharmacon) was annealed to tracrRNA  
148 (Sigma) in IDT Duplex buffer (IDT). This, along with Geneart Platinum Cas9 nuclease  
149 (Invitrogen B25641) and repair oligo A193P (Table 1) were used for pronuclear injection as  
150 described above. Pups born were screened for the targeted changes by sequencing PCR  
151 fragments generated using the oligos ex7F and ex7R (Supplementary Table S1) and lines  
152 established carrying the targeted missense mutations. Genotyping was initially done by  
153 PCR, and sequencing where appropriate, using the primers in Supplementary Table S1.  
154 Subsequently most genotyping was performed by Transnetyx using custom designed assays  
155 (<http://www.transnetyx.com>). All lines were maintained on the C57BL/6J mouse strain  
156 background.

## 157 **DNA Sequencing**

158 The candidate interval was captured using a custom Nimblegen array and sequenced with  
159 454 technology by Edinburgh Genomics (formerly known as GenePool)  
160 (<http://www.genomics.ed.ac.uk>).

## 161 **Electroretinography**

162 All electroretinography was carried out according to International Society for Clinical  
163 Electrophysiology of Vision guidelines. Prior to electroretinography mice were dark adapted  
164 overnight (>16 hours) and experiments were carried out in a darkened room under red light  
165 using an HMsERG system (Ocuscience). Mice were anesthetised using isoflurane and  
166 their pupils dilated by the topical application of 1% w/v tropicamide. Three grounding  
167 electrodes were placed subcutaneously (tail, and each cheek) and silver embedded  
168 electrodes were positioned on the corneas using hypromellose eye drops (2.5%  
169 methylcellulose coupling agent) held in place with a contact lens. Animals were kept on a  
170 heated platform to maintain them at 37°C and monitored using a rectal thermometer. A  
171 modified QuickRetCheck (Ocuscience) protocol was used for obtaining full-field scotopic

172 ERGs. Briefly, 4 flashes at 10 mcd.s/m<sup>2</sup> at 2 s intervals were followed by 4 flashes at 3  
173 cd.s/m<sup>2</sup> (at 10 s intervals) and then 4 flashes at 10 cd.s/m<sup>2</sup> (at 10 s intervals).

174

## 175 **Histology and Immunostaining**

176 Mice were culled, eyes enucleated and placed into Davidson's fixative (28.5% ethanol, 2.2%  
177 neutral buffered formalin, 11% glacial acetic acid) for 1 hour (cryosectioning) or overnight  
178 (wax embedding) except for the eye used for Fig. 1 which was placed in 10% neutral  
179 buffered formalin for 24 hours before immersion in Davidson's fixative. Prior to wax  
180 embedding eyes were dehydrated through an ethanol series. Haematoxylin and eosin  
181 staining was performed on 5 or 10 µm paraffin embedded tissue sections and images  
182 captured using a Nanozoomer XR scanner (Hamamatsu) and viewed using NDP.view2  
183 software. For cryosectioning, fixed eyes were transferred to 5% sucrose in PBS and once  
184 sunk transferred to 20% sucrose in PBS overnight. Eyes were then embedded in OCT  
185 compound and cryosectioned at 14 µM. For immunostaining on cryosections, slides were  
186 washed with water then PBS and post-fixed in acetone at -20°C for 10 minutes. They were  
187 then rinsed with water, blocked in 10% DS, 0.1% Tween-20 in TBS (TBST) for one hour and  
188 then incubated with primary antibodies diluted in TBST with 5% DS for two hours at room  
189 temperature or overnight at 4°C. Subsequently, after washing with TBST, the slides were  
190 incubated with Alexa Fluor secondary antibodies (Invitrogen) diluted 1:400 in TBST with 5%  
191 DS at room temperature for one hour. Following washing with TBST coverslips were  
192 mounted on slides in Prolong Gold (ThermoFisher Scientific) and confocal images acquired  
193 on a Nikon A1R microscope. Images were processed using either NIS-Elements or ImageJ  
194 software.

195

## 196 **Antibodies**

197 Primary antibodies used are listed in Table 2. DNA was stained with TOTO-3 (Invitrogen) or  
198 4',6-Diamidino-2'-phenylindole dihydrochloride (DAPI).

199

## 200 **Transmission Electron Microscopy**

201 Samples were fixed in 2% EM grade glutaraldehyde (TAAB Laboratory Equipment,  
202 Aldermaston, UK) in sodium cacodylate buffer at 4°C overnight, post-fixed in 1% osmium



203 tetroxide (Agar Scientific, Essex, UK), dehydrated in increasing concentrations of acetone  
204 and impregnated with increasing concentrations of epoxy resin (TAAB Laboratory  
205 Equipment). Embedding was carried out in 100% resin at 60°C for 24 hours. Semi-thin  
206 survey sections of 1 µm, stained with toluidine blue, were taken to determine relevant area.  
207 Ultrathin sections (approximately 70 nm) were then cut using a diamond knife on a Leica EM  
208 UC7 ultramicrotome (Leica, Allendale, NJ, USA). The sections were stretched with  
209 chloroform to eliminate compression and mounted on Pioloform-film copper grids (Gilder  
210 Grids, Grantham UK). To increase contrast the grids were stained with 2% aqueous uranyl  
211 acetate and lead citrate (Leica). The grids were examined using a Philips CM 100  
212 Compustage (FEI) Transmission Electron Microscope. Digital images were collected using  
213 an AMT CCD camera (Deben UK Ltd., Suffolk, UK).

214

## 215 **Statistics**

216 For the data shown in Figure 3 an unpaired t test with Welch's correction was performed. For  
217 the data shown in Tables 3, S2 and S3 chi square tests were performed using  
218 <http://graphpad.com/quickcalcs>. A value of  $P < 0.05$  was considered significant.

219

## 220 **RESULTS**

### 221 ***Rwhs* is a missense mutation of the *Tmem98* gene**

222 The *N*-ethyl-*N*-nitrosourea (ENU)-induced mouse mutation retinal white spots (*Rwhs*) was  
223 found in a screen for dominant eye mutations<sup>35</sup>. Mice heterozygous for the mutation have  
224 white patches on retinal imaging, apparently corresponding to folds or invaginations of the  
225 photoreceptor layers (Fig. 1A-B). Initial mapping indicated that *Rwhs* was located within an  
226 8.5 Mb region of chromosome 11<sup>35</sup>. The retinal phenotype was found on a mixed Balb/c and  
227 C3H background. When *Rwhs* mutant mice were backcrossed to the C57BL/6J strain to  
228 refine the genetic mapping, some obligate heterozygous mice had retinas with a normal  
229 appearance, indicating that the dominant *Rwhs* phenotype is not completely penetrant and  
230 that modifiers in the C57BL/6J strain can attenuate it (Supplementary Fig. S1A-D). Crossing  
231 *Rwhs* to the wild-derived CAST strain restored the retinal phenotype (Supplementary Fig.  
232 S1E-F). Intercrossing of heterozygous mice produced no homozygous offspring at weaning,  
233 whereas at late gestation (E17.5-E18.5) fetuses of the three expected genotypes were  
234 present at Mendelian ratios indicating that homozygous *Rwhs* is perinatally lethal (Table 3)



235 (an initial report suggesting that homozygous *Rwhs* mice were viable was incorrect and due  
236 to mapping errors<sup>35</sup>). We mapped this lethal phenotype by intercrossing recombinant  
237 animals and refined the critical interval to a 200 kb region between the single nucleotide  
238 polymorphism markers rs216663786 and rs28213460 on chromosome 11. This region  
239 contains the *Tmem98* gene and parts of the *Myo1d* and *Spaca3* genes. We amplified and  
240 sequenced all the exons and flanking regions from this region from *Rwhs* mutant mice along  
241 with controls. In addition we captured and sequenced all genomic DNA in the candidate  
242 interval. We found only a single nucleotide change in the mutant strain compared to the  
243 strain of origin, a T to C transition, in exon 5 of *Tmem98* (position 11:80,817,609 Mouse Dec.  
244 2011 (GRCm38/mm10) Assembly (<https://genome.ucsc.edu/>)) (Fig. 1C). This mutation leads  
245 to the substitution of the non-polar aliphatic amino acid, isoleucine, by the polar amino acid  
246 threonine (I135T, numbering from entry Q91X86, <http://www.uniprot.org>). We also  
247 investigated the effect of loss-of-function of *Tmem98*. Heterozygous loss-of-function mice  
248 are viable and fertile and have normal retinas (Fig. S6D and F). Matings of heterozygous  
249 mice carrying the “knock-out first” *Tmem98*<sup>tm1a</sup> allele produced no homozygous offspring  
250 (Supplementary Table S2) demonstrating that loss-of-function of *Tmem98* is lethal. At E16.5-  
251 E17.5 the three expected genotypes were present at Mendelian ratios (Supplementary Table  
252 S2) and in one litter collected at birth there were three homozygotes and three wild-types  
253 indicating that lethality occurs perinatally.

254 TMEM98 is a 226 amino acid protein annotated with a transmembrane domain spanning  
255 amino acids 4-24 close to the N-terminus (<http://www.ensembl.org>). It is highly conserved  
256 across species; mouse and human TMEM98 share 98.7% amino acid identity and between  
257 mouse and *Ciona intestinalis*, the closest invertebrate species to the vertebrates, there is  
258 38.6% amino acid identity in which I135 is conserved (Supplementary Fig. S2). *TMEM98* is  
259 widely expressed and is reported to be most highly expressed in human and mouse RPE  
260 (<http://www.biogps.org>). We confirmed its high expression in the RPE and, within the retina,  
261 we also find expression at a lower level in the ganglion cell layer (Fig. 1D). The protein has  
262 been reported to be a single-pass type II transmembrane protein in which the C-terminal part  
263 is extracellular<sup>39</sup>.

264

265 **The Human Nanophthalmos Missense Mutations Cause a Retinal Phenotype in the**  
266 **Mouse**

267 Three mutations in *TMEM98* have been implicated in autosomal dominant nanophthalmos in  
268 human families<sup>21, 22</sup>. Two are missense mutations, A193P and H196P. The third is a 34 bp  
269 deletion spanning the exon 4/intron 5 boundary<sup>22</sup>. The effect of this on splicing of the  
270 *TMEM98* mRNA is unknown, but if the deletion leads to the 132 bp exon 4 being skipped  
271 then an aberrant protein with a 44 amino acid internal deletion would be produced. Both  
272 missense mutations affect amino acids that are highly conserved (Supplementary Fig. S2)  
273 and introduce a proline in the final  $\alpha$ -helix of the protein which would likely lead to disruption  
274 of the secondary structure of the protein.

275 To investigate the effect of the two missense mutations we used CRISPR-Cas9 to introduce  
276 A193P and H196P into the mouse gene and established lines carrying each. Western blot  
277 analysis using a validated anti-TMEM98 antibody (Supplementary Fig. S3A) showed that the  
278 mutant proteins are expressed (Supplementary Fig. S3B). Heterozygous mice for both  
279 missense mutations were viable and fertile and did not exhibit any gross eye or retinal  
280 defects when examined between 5-9 months of age (Supplementary Fig. S4, *Tmem98*<sup>A193P/+</sup>,  
281 n=10; *Tmem98*<sup>H196P/+</sup>, n=19). In contrast to the *Tmem98*<sup>135T</sup> and knock-out alleles,  
282 homozygotes for both the *Tmem98*<sup>A193P</sup> and *Tmem98*<sup>H196P</sup> alleles were viable and found at  
283 the expected Mendelian ratios (Supplementary Table S3). The eyes of homozygous and  
284 compound heterozygous mice do not appear to be significantly different in size when  
285 compared to wild-type eyes (Fig. 2A). From about 3 months of age we found that white  
286 patches developed on the retinas of the homozygous mice and on histological examination  
287 we found folds or invaginations in the retinal layers (Fig. 2B). The appearance of the white  
288 patches was progressive; at younger ages the retinas of some homozygous mice appeared  
289 normal with patches becoming apparent as they aged (Supplementary Fig. S5). In the  
290 A193P line only 6 of 7 homozygotes were found to have retinal defects at 6 months of age;  
291 the seventh developed white patches on the retina by 9 months. In the H196P line 4/20  
292 homozygous mice that were examined between 3 and 3.5 months of age appeared to have  
293 normal retinas. We crossed the lines together to generate compound heterozygotes.  
294 *Tmem98*<sup>A193P/H196P</sup> (n=4) mice also displayed a similar phenotype of white patches on the  
295 retina (Fig. 2B). We also crossed *Tmem98*<sup>H196P</sup> mice with mice carrying a loss-of-function  
296 allele *Tmem98*<sup>tm1b</sup>. Compound heterozygous mice were viable and of 17 mice examined all  
297 had normal retinas except for one mouse which had three faint spots on one retina at 1 year  
298 of age (Supplementary Fig. S6). These results suggest that a threshold level of the mutant  
299 missense TMEM98<sup>H196P</sup> and TMEM98<sup>A193P</sup> proteins is required to elicit the formation of white

300 patches on the retina and that the missense mutations found in the human nanophthalmos  
301 patients are not loss-of-function.

302 To assess retinal function electroretinography was carried out on *Tmem98*<sup>H196PT/H196P</sup> mice  
303 and controls at 6 months of age (Fig. 3). There was no significant difference in the a-wave  
304 amplitudes between the wild-type and mutant mice.

### 305 **Characterisation of the Retinal Folds Caused by the A193P and H196P Mutations**

306 We investigated the retinal folds by immunostaining of retinal sections. We found that in the  
307 interior of retinal folds the outer segment layer is massively expanded as demonstrated by  
308 positive staining for the transmembrane protein prominin-1 and the rod and cone opsins  
309 (rhodopsin and ML opsin), indicating that the folds are filled with excess, disorganised outer  
310 segments or remnants of outer segments (Fig. 4).

311 The retinal folds and rosettes seen in other mutant mouse lines are accompanied by defects  
312 in the OLM. This structure is formed by adherens junctions between the Müller glia cells and  
313 the photoreceptors. We investigated the integrity of the OLM in our mutant mice by staining  
314 for  $\beta$ -catenin (Fig. 5A-D). In control mice and in the regions of the retinas of mutant mice  
315 unaffected by folds the OLM appeared intact. However, at the folds the OLM is clearly  
316 disrupted and gaps can be seen suggesting that cell-cell connections have been broken.  
317 Reactive gliosis indicated by upregulation of GFAP in the Müller cells is a response to retinal  
318 stress, injury or damage<sup>40</sup>. We observed abnormal GFAP staining in the mutant retinas that  
319 was confined to the regions with folds, indicating that in these areas, but not elsewhere in  
320 the retina, there is a stress response (Fig. 5E-H, Supplementary Fig. S7A-D). We also  
321 stained for F4/80, a marker for macrophages/microglia. In the mutant retinas positive  
322 staining was found in the interior of retinal folds but not elsewhere in the photoreceptor layer  
323 (Fig. 5J-L, Supplementary Fig. S7E-H). The amoeboid shape of the positively-stained cells  
324 suggests that they are macrophages that have infiltrated into the retinal folds containing  
325 excess and disorganised outer segments and that they are phagocytosing degenerating  
326 outer segments. We did not observe melanin within the macrophages indicating that they  
327 had not engulfed pigmented RPE cells. Finally we examined by transmission electron  
328 microscopy the ultrastructural architecture of the boundary between the RPE and outer  
329 segments (Fig. 6). For the homozygous mutants, in retinal areas without folds, the boundary  
330 between outer segments and RPE appeared normal (compare Fig. 6A with Fig. 6B and D).  
331 However, in the areas with folds the outer segments were disorganised and appeared to be  
332 degenerating, with cavities and other cellular debris apparent (Fig. 6C and 6E).

333

## 334 **DISCUSSION**

### 335 ***Rwhs* is Caused by a Missense Mutation in *Tmem98* that is Homozygous Lethal**

336 Here we report that the ENU-induced dominant retinal white spotting phenotype, *Rwhs*, is  
337 caused by an I135T missense mutation in the highly conserved transmembrane protein  
338 encoding gene *Tmem98*. We also found that when homozygous the *Tmem98*<sup>I135T</sup> allele is  
339 perinatally lethal. *Tmem98* was one of the genes included in an international project to  
340 produce and phenotype knockout mouse lines for 20,000 genes<sup>41</sup>. The targeted allele,  
341 *Tmem98*<sup>tm1a</sup>, was subjected to a high-content phenotyping pipeline (results available at  
342 <http://www.mousephenotype.org/data/genes/MGI:1923457>). It was found to be lethal pre-  
343 weaning as homozygotes, but no significant heterozygous phenotypic variation from wild-  
344 type was reported. Neither their slit lamp analysis nor our retinal examination found any eye  
345 defects in knock-out heterozygous mice. We also found that *Tmem98*<sup>tm1a</sup> is homozygous  
346 lethal and narrowed the stage of lethality to the perinatal stage (Table S1). This suggests  
347 that haploinsufficiency for TMEM98 protein does not cause a retinal phenotype and that the  
348 I135T mutation in TMEM98 is not a loss-of-function allele but changes the protein's function  
349 leading to the retinal white spotting phenotype.

350

### 351 **Phenotype of Human Nanophthalmos Associated *TMEM98* Missense Mutations in the** 352 **Mouse**

353 *Tmem98* has been previously suggested to be a novel chemoresistance-conferring gene in  
354 hepatocellular carcinoma<sup>42</sup>. It has also been reported to be able to promote the  
355 differentiation of T helper 1 cells and to be involved in the invasion and migration of lung  
356 cancer cells<sup>39, 43</sup>. Recently it has been reported that TMEM98 interacts with MYRF and  
357 prevents its autocatalytic cleavage<sup>44</sup>. In relation to human disease two TMEM98 missense  
358 mutations, A193P and H196P, have been reported to be associated with dominant  
359 nanophthalmos<sup>21, 22</sup>. We introduced these mutations into the mouse gene and found that  
360 mice homozygous for either, or compound heterozygous for both, developed white patches  
361 on their retinas accompanied by retinal folds, replicating the dominant phenotype found in  
362 the ENU-induced allele. We also observed for all three alleles separation of the RPE away  
363 from the neural retina in the areas under the folds. Mice lacking *Tmem98* do not survive after  
364 birth (Supplementary Table S2). The three missense mutations described here are not null.

365 The two human mutations are homozygous viable, and the mouse mutation, when in  
366 combination with a knock-out allele is also viable (data not shown). Furthermore, the H196P  
367 missense mutation in combination with a gene knockout has no detectable eye phenotype  
368 and the mice are viable (Supplementary Fig. S6). This indicates that the recessive mutations  
369 are not loss of function, but are gain of function with, in the case of H196P at least, a  
370 threshold dosage requirement. However, the phenotypes are different from the reported  
371 dominant nanophthalmos caused by the same mutations in humans.

372 Other genes causing nanophthalmos may also be gain of function. The serine protease  
373 *PRSS56* is a recessive posterior microphthalmia or nanophthalmos mutant gene in humans,  
374 with both identified mutations affecting the C-terminus of the protein<sup>17</sup>. The mouse mutant  
375 model of this gene, which produces a variable and slight reduction in ocular length, is a  
376 splice site mutation resulting in a truncated protein which nevertheless has normal protease  
377 activity *in vitro*<sup>17</sup>. Recently the phenotype of a null allele of *Prss56* has been described and it  
378 does cause some reduction in ocular size and hyperopia<sup>34</sup>.

379 The mouse model of the nanophthalmos gene, *Mfrp*, does not reproduce the human  
380 phenotype. Rather, loss of function of this gene results in white spots apparent on retinal  
381 imaging (retinitis punctata albicans) but these have different origin from the phenotype we  
382 observe, and progress to photoreceptor degeneration. It has been reported that the *Mfrp*  
383 knockout mice have eyes that are slightly (but not statistically significantly) smaller, by about  
384 2% in axial length. It is worth noting that different strains of mice have measurably different  
385 ocular size. Strain differences of up to 2% and sex differences of over 1.5% have been  
386 reported<sup>45</sup>.

387 Two genes that are infrequently associated with nanophthalmos, *CRB1* and *BEST1*, both can  
388 produce a mouse phenotype apparently indistinguishable from the one we describe here.  
389 Furthermore, the knockout mouse model of the nuclear receptor gene, *Nrl*, also develops  
390 retinal rosettes during post-natal life<sup>46</sup>. The *Nrl* mutant eye has defects in the outer limiting  
391 membrane (OLM), a component of which is the CRB1 protein. The *Tmem98* mutations have  
392 OLM defects, but we cannot ascertain whether these defects are the primary cause of the  
393 folds or a secondary consequence.

394 Retinal folds are a characteristic of nanophthalmic eyes and this is usually attributed to a  
395 differential growth of neural retina within the smaller optic cup. Our data show that folds can  
396 be seen in a normal-sized eye, but we do not know whether there is nevertheless excess

397 growth of the neural retina. The retinal defects we see are not associated with an ERG  
398 deficit, suggesting that the rest of the retina, unaffected by the folds, is functionally normal.  
399 Notable is the detachment of the retina from the RPE within the folds (rosettes). In the *Nrl*  
400 and *Crb1* mutant eyes the photoreceptors that have lost their connection to the RPE can be  
401 seen to degenerate. We see no evidence of photoreceptor degeneration in the *Tmem98*  
402 mutants. The mechanism of the pathology is still unclear. As *Tmem98* is strongly expressed  
403 in the RPE, and not at all in the photoreceptors, it is likely that RPE is the affected tissue.  
404 The key observation in these and other mouse models of nanophthalmos is that the defects  
405 are focal and progressive, suggesting that secondary events exacerbate an underlying but  
406 (given ERG data) non-pathological defect. The accumulation of photoreceptor cell debris  
407 below the retinal folds suggests a focal defect in outer segment phagocytosis but one that  
408 does not lead to photoreceptor degeneration. Three of the genes associated with  
409 nanophthalmos are expressed in the RPE; *Tmem98*, *Best1* and *Myrf*. *Crb1* is expressed in  
410 photoreceptors and *Prss56*, a secreted serine protease, is expressed in the Müller cells. It is  
411 possible that these genes interact and affect a common pathway, indeed upregulation of  
412 *Prss56* has been observed in *Mfrp* mutants<sup>47</sup>. The recent finding that TMEM98 binds to and  
413 prevents the activation of the oligodendrocyte transcription factor MYRF (also highly  
414 expressed in the RPE; <http://www.biogps.org>) will perhaps lead to a mechanistic explanation  
415 <sup>44</sup>.

416

## 417 **Acknowledgements**

418 We thank Morag Robertson for help with genotyping, Craig Nicol and Connor Warnock for  
419 help with photography, the IGMM Advanced Imaging Resource for help with imaging and  
420 MRC Human Genetics Unit scientific support services.

## 421 **References**

- 422 1. Verma AS, FitzPatrick DR. Anophthalmia and microphthalmia. *Orphanet journal of rare*  
423 *diseases* 2007;2:47.
- 424 2. Carricondo PC, Andrade T, Prasov L, Ayres BM, Moroi SE. Nanophthalmos: A Review of the  
425 Clinical Spectrum and Genetics. *Journal of ophthalmology* 2018;2018.
- 426 3. Boon CJ, Klevering BJ, Leroy BP, Hoyng CB, Keunen JE, den Hollander AI. The spectrum of  
427 ocular phenotypes caused by mutations in the BEST1 gene. *Progress in retinal and eye research*  
428 2009;28:187-205.
- 429 4. Marmorstein AD, Marmorstein LY, Rayborn M, Wang X, Hollyfield JG, Petrukhin K.  
430 Bestrophin, the product of the Best vitelliform macular dystrophy gene (VMD2), localizes to the



- 431 basolateral plasma membrane of the retinal pigment epithelium. *Proceedings of the National*  
432 *Academy of Sciences* 2000;97:12758-12763.
- 433 5. Petrukhin K, Koisti MJ, Bakall B, et al. Identification of the gene responsible for Best macular  
434 dystrophy. *Nature genetics* 1998;19:241.
- 435 6. Yardley J, Leroy BP, Hart-Holden N, et al. Mutations of VMD2 splicing regulators cause  
436 nanophthalmos and autosomal dominant vitreoretinopathy (ADVIRC). *Investigative*  
437 *ophthalmology & visual science* 2004;45:3683-3689.
- 438 7. Pellikka M, Tanentzapf G, Pinto M, et al. Crumbs, the Drosophila homologue of human  
439 CRB1/RP12, is essential for photoreceptor morphogenesis. *Nature* 2002;416:143.
- 440 8. den Hollander AI, Jacoline B, de Kok YJ, et al. Mutations in a human homologue of  
441 Drosophila crumbs cause retinitis pigmentosa (RP12). *Nature genetics* 1999;23:217.
- 442 9. den Hollander AI, Heckenlively JR, van den Born LI, et al. Leber congenital amaurosis and  
443 retinitis pigmentosa with Coats-like exudative vasculopathy are associated with mutations in the  
444 crumbs homologue 1 (CRB1) gene. *The American Journal of Human Genetics* 2001;69:198-203.
- 445 10. Zenteno JC, Buentello-Volante B, Ayala-Ramirez R, Villanueva-Mendoza C. Homozygosity  
446 mapping identifies the Crumbs homologue 1 (Crb1) gene as responsible for a recessive syndrome of  
447 retinitis pigmentosa and nanophthalmos. *American Journal of Medical Genetics Part A*  
448 2011;155:1001-1006.
- 449 11. Paun CC, Pijl BJ, Siemiatkowska AM, et al. A novel crumbs homolog 1 mutation in a family  
450 with retinitis pigmentosa, nanophthalmos, and optic disc drusen. *Molecular vision* 2012;18:2447.
- 451 12. Sundin OH, Leppert GS, Silva ED, et al. Extreme hyperopia is the result of null mutations in  
452 MFRP, which encodes a Frizzled-related protein. *Proceedings of the National Academy of Sciences*  
453 2005;102:9553-9558.
- 454 13. Ayala-Ramirez R, Graue-Wiechers F, Robredo V, Amato-Almanza M, Horta-Diez I, Zenteno JC.  
455 A new autosomal recessive syndrome consisting of posterior microphthalmos, retinitis pigmentosa,  
456 foveoschisis, and optic disc drusen is caused by a MFRP gene mutation. *Molecular vision*  
457 2006;12:1483-1489.
- 458 14. Zenteno JC, Buentello-Volante B, Quiroz-González MA, Quiroz-Reyes MA. Compound  
459 heterozygosity for a novel and a recurrent MFRP gene mutation in a family with the nanophthalmos-  
460 retinitis pigmentosa complex. *Molecular vision* 2009;15:1794.
- 461 15. Neri A, Leaci R, Zenteno JC, Casubolo C, Delfini E, Macaluso C. Membrane frizzled-related  
462 protein gene-related ophthalmological syndrome: 30-month follow-up of a sporadic case and review  
463 of genotype-phenotype correlation in the literature. *Molecular vision* 2012;18:2623.
- 464 16. Gal A, Rau I, El Matri L, et al. Autosomal-recessive posterior microphthalmos is caused by  
465 mutations in PRSS56, a gene encoding a trypsin-like serine protease. *The American Journal of Human*  
466 *Genetics* 2011;88:382-390.
- 467 17. Nair KS, Hmani-Aifa M, Ali Z, et al. Alteration of the serine protease PRSS56 causes angle-  
468 closure glaucoma in mice and posterior microphthalmia in humans and mice. *Nature Genetics*  
469 2011;43:579.
- 470 18. Orr A, Dubé M-P, Zenteno JC, et al. Mutations in a novel serine protease PRSS56 in families  
471 with nanophthalmos. *Molecular vision* 2011;17:1850.
- 472 19. Kiefer AK, Tung JY, Do CB, et al. Genome-wide analysis points to roles for extracellular matrix  
473 remodeling, the visual cycle, and neuronal development in myopia. *PLoS genetics* 2013;9:e1003299.
- 474 20. Verhoeven VJ, Hysi PG, Wojciechowski R, et al. Genome-wide meta-analyses of  
475 multiancestry cohorts identify multiple new susceptibility loci for refractive error and myopia. *Nat*  
476 *Genet* 2013;45:314-318.
- 477 21. Awadalla MS, Burdon KP, Souzeau E, et al. Mutation in TMEM98 in a large white kindred  
478 with autosomal dominant nanophthalmos linked to 17p12-q12. *JAMA ophthalmology* 2014;132:970-  
479 977.



- 480 22. Khorram D, Choi M, Roos BR, et al. Novel TMEM98 mutations in pedigrees with autosomal  
481 dominant nanophthalmos. *Molecular vision* 2015;21:1017-1023.
- 482 23. Sun W, Zhang Q. Does the association between TMEM98 and nanophthalmos require  
483 further confirmation? *JAMA ophthalmology* 2015;133:358-359.
- 484 24. Marmorstein LY, Wu J, McLaughlin P, et al. The light peak of the electroretinogram is  
485 dependent on voltage-gated calcium channels and antagonized by bestrophin (best-1). *The Journal*  
486 *of general physiology* 2006;127:577-589.
- 487 25. Milenkovic A, Brandl C, Milenkovic VM, et al. Bestrophin 1 is indispensable for volume  
488 regulation in human retinal pigment epithelium cells. *Proceedings of the National Academy of*  
489 *Sciences* 2015;112:E2630-E2639.
- 490 26. Zhang Y, Stanton JB, Wu J, et al. Suppression of Ca<sup>2+</sup> signaling in a mouse model of Best  
491 disease. *Human molecular genetics* 2010;19:1108-1118.
- 492 27. Mehalow AK, Kameya S, Smith RS, et al. CRB1 is essential for external limiting membrane  
493 integrity and photoreceptor morphogenesis in the mammalian retina. *Human molecular genetics*  
494 2003;12:2179-2189.
- 495 28. van de Pavert SA, Kantardzhieva A, Malysheva A, et al. Crumbs homologue 1 is required for  
496 maintenance of photoreceptor cell polarization and adhesion during light exposure. *Journal of Cell*  
497 *Science* 2004;117:4169-4177.
- 498 29. van de Pavert SA, Meuleman J, Malysheva A, et al. A single amino acid substitution  
499 (Cys249Trp) in Crb1 causes retinal degeneration and deregulates expression of pituitary tumor  
500 transforming gene Pttg1. *Journal of Neuroscience* 2007;27:564-573.
- 501 30. Kameya S, Hawes NL, Chang B, Heckenlively JR, Naggert JK, Nishina PM. Mfrp, a gene  
502 encoding a frizzled related protein, is mutated in the mouse retinal degeneration 6. *Human*  
503 *molecular genetics* 2002;11:1879-1886.
- 504 31. Fogerty J, Besharse JC. 174delG mutation in mouse MFRP causes photoreceptor  
505 degeneration and RPE atrophy. *Investigative ophthalmology & visual science* 2011;52:7256-7266.
- 506 32. Hawes NL, Chang B, Hageman GS, et al. Retinal degeneration 6 (rd6): a new mouse model for  
507 human retinitis punctata albescens. *Investigative ophthalmology & visual science* 2000;41:3149-  
508 3157.
- 509 33. Velez G, Tsang SH, Tsai Y-T, et al. Gene Therapy Restores Mfrp and Corrects Axial Eye Length.  
510 *Scientific Reports* 2017;7:16151.
- 511 34. Paylakhi S, Labelle-Dumais C, Tolman NG, et al. Muller glia-derived PRSS56 is required to  
512 sustain ocular axial growth and prevent refractive error. *PLoS Genet* 2018;14:e1007244.
- 513 35. Thaug C, West K, Clark BJ, et al. Novel ENU-induced eye mutations in the mouse: models  
514 for human eye disease. *Human molecular genetics* 2002;11:755-767.
- 515 36. White JK, Gerdin A-K, Karp NA, et al. Genome-wide generation and systematic phenotyping  
516 of knockout mice reveals new roles for many genes. *Cell* 2013;154:452-464.
- 517 37. Skarnes WC, Rosen B, West AP, et al. A conditional knockout resource for the genome-wide  
518 study of mouse gene function. *Nature* 2011;474:337.
- 519 38. Cong L, Ran FA, Cox D, et al. Multiplex genome engineering using CRISPR/Cas systems.  
520 *Science* 2013;1231143.
- 521 39. Fu W, Cheng Y, Zhang Y, et al. The Secreted Form of Transmembrane Protein 98 Promotes  
522 the Differentiation of T Helper 1 Cells. *Journal of interferon & cytokine research : the official journal*  
523 *of the International Society for Interferon and Cytokine Research* 2015;35:720-733.
- 524 40. Lewis GP, Fisher SK. Up-regulation of glial fibrillary acidic protein in response to retinal  
525 injury: its potential role in glial remodeling and a comparison to vimentin expression. *International*  
526 *review of cytology* 2003;230:264-290.
- 527 41. Brown SD, Holmes CC, Mallon A-M, Meehan TF, Smedley D, Wells S. High-throughput mouse  
528 phenomics for characterizing mammalian gene function. *Nature Reviews Genetics* 2018;1.

- 529 42. Ng KT, Lo CM, Guo DY, et al. Identification of transmembrane protein 98 as a novel  
530 chemoresistance-conferring gene in hepatocellular carcinoma. *Molecular cancer therapeutics*  
531 2014;13:1285-1297.
- 532 43. Mao M, Chen J, Li X, Wu Z. siRNA-TMEM98 inhibits the invasion and migration of lung cancer  
533 cells. *International journal of clinical and experimental pathology* 2015;8:15661-15669.
- 534 44. Huang H, Teng P, Du J, et al. Interactive repression of MYRF self-cleavage and activity in  
535 oligodendrocyte differentiation by TMEM98 protein. *The Journal of neuroscience : the official journal*  
536 *of the Society for Neuroscience* 2018.
- 537 45. Puk O, de Angelis MH, Graw J. Longitudinal fundus and retinal studies with SD-OCT: a  
538 comparison of five mouse inbred strains. *Mamm Genome* 2013;24:198-205.
- 539 46. Haider NB, Naggert JK, Nishina PM. Excess cone cell proliferation due to lack of a functional  
540 NR2E3 causes retinal dysplasia and degeneration in rd7/rd7 mice. *Human molecular genetics*  
541 2001;10:1619-1626.
- 542 47. Soundararajan R, Won J, Stearns TM, et al. Gene profiling of postnatal Mfrprd6 mutant eyes  
543 reveals differential accumulation of Prss56, visual cycle and phototransduction mRNAs. *PLoS one*  
544 2014;9:e110299.

545

## 546 Tables

547 **Table 1. Sequences of oligos**

| Oligo Name        | Sequence (5'-3')*                                                                                                                                                                                                        |
|-------------------|--------------------------------------------------------------------------------------------------------------------------------------------------------------------------------------------------------------------------|
| <b>ex7_Guide1</b> | CACCGGCCAATCACTGTCTGCCGCTG                                                                                                                                                                                               |
| <b>ex7_Guide2</b> | AAACCAGCGGCAGACAGTGATTGGCC                                                                                                                                                                                               |
| <b>A193P</b>      | AACCGCCCTGCTGCTGTCCGTTAGTCACTTGGTGCTAGTGACCAGGA<br>ACGCCTGCCATCTAACCGGGGGCCTGGACTGGATTGACCAATCACT<br>GTCTGCCCTGAAGAGCACCTGGAAGTCCTTCGAGAGGCAGCCCTG<br>GCTTCTGAGCCAGATAAAAGCCTCCCCAACCCCTGAGGGCTTCCTGCA<br>GGAACAGTCGGCCA |
| <b>H196P</b>      | AACCGCCCTGCTGCTGTCCGTTAGTCACTTGGTGCTAGTGACCAGGA<br>ACGCCTGCCATCTAACCGGGGGCCTGGACTGGATTGACCAATCACT<br>GTCTGCCGCTGAAGAGCCCTGGAAGTCCTTCGAGAGGCAGCCCTG<br>GCTTCTGAGCCAGATAAAAGCCTCCCCAACCCCTGAGGGCTTCCTGCA<br>GGAACAGTCGGCCA |

548 \*For the repair oligos base changes introducing amino acid changes are highlighted in red  
549 and silent base changes destroying the PAM site are highlighted in blue. In the A193P line  
550 only the mutation causing the A193P change was found, in the H196P line both base  
551 changes were incorporated.

552

553 **Table 2. Primary antibodies**

| <b>Antibody</b>         | <b>Source</b>             | <b>Product No</b> | <b>Concentration used</b> |
|-------------------------|---------------------------|-------------------|---------------------------|
| anti-TMEM98             | proteintech               | 14731-1-AP        | 1:5000 (WB), 1:100 (IF)   |
| anti- $\alpha$ -Tubulin | Sigma-Aldrich             | T5168             | 1:10,000 (WB)             |
| anti-Prominin 1         | proteintech               | 18470-1-AP        | 1:100 (IF)                |
| anti-Rhodopsin          | Millipore                 | MAB5356           | 1:500 (IF)                |
| anti-ML Opsin           | Millipore                 | AB5405            | 1:500 (IF)                |
| anti-GFAP               | abcam                     | ab7260            | 1:500 (IF)                |
| anti- $\beta$ -Catenein | Cell Signaling Technology | 19807S            | 1:500 (IF)                |
| Anti-F4/80              | AbD Serotec               | MCA497EL          | 1:500 (IF)                |

554 Key: WB=Western blotting, IF=immunofluorescence

555

556 **Table 3. *Tmem98*<sup>Rwhs/+</sup> intercross genotyping results**

| <b>Age</b>  | <b>WT</b> | <b>Rwhs/+</b> | <b>Rwhs/Rwhs</b> | <b>Total</b> | <b>P*</b> |
|-------------|-----------|---------------|------------------|--------------|-----------|
| adult       | 34        | 79            | 0                | 113          | <0.0001   |
| E17.5-E18.5 | 2         | 12            | 5                | 19           | 0.3225    |

557 \*Test for significance using chi-square test

558 **Figures**

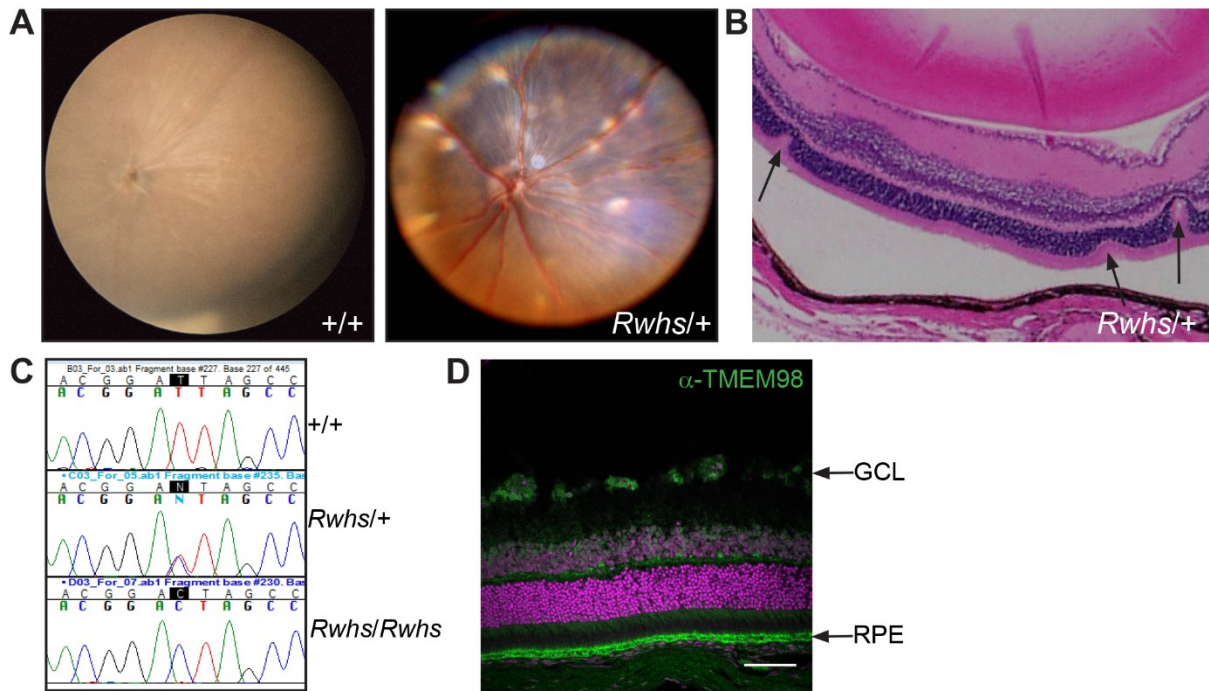

559

560 **Figure 1.** The *Rwhs* mutation is caused by an I135T mutation of the transmembrane gene  
561 *Tmem98*. (A) Retinal images of wild-type (+,+) and *Rwhs*/+ eyes. Scattered white spots are  
562 present on the *Rwhs*/+ retina. (B) *Rwhs*/+ retinal section with three folds in the outer nuclear  
563 layer indicated by arrows. (C) Genomic DNA sequence traces from exon 5 of *Tmem98* from  
564 wild-type (+/+), heterozygous mutant (*Rwhs*/+) and homozygous mutant (*Rwhs*/*Rwhs*)  
565 embryonic samples. The position of the T-to-C transition at position 404 (404T>C) in  
566 *Tmem98* is highlighted. (D) A section of wild-type retina immunostained for TMEM98  
567 (green). Prominent staining is seen in the retinal pigment epithelium (RPE) and there is also  
568 some staining in the ganglion cell layer (GCL). DNA is shown in magenta. Scale bar: 100  $\mu$ M  
569 (D).

570



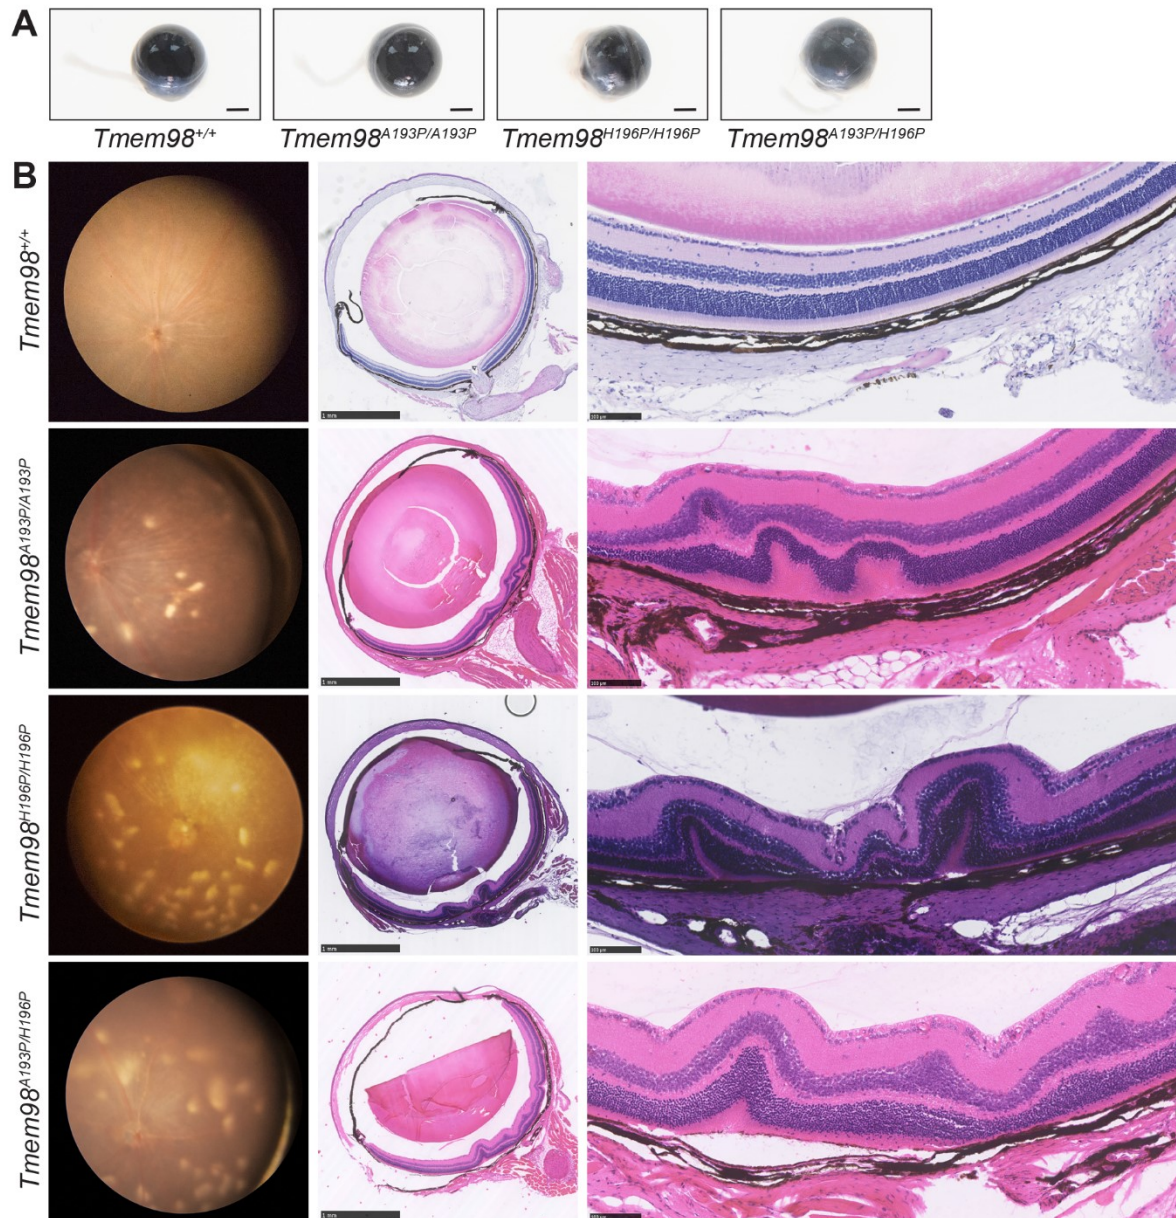

571

572 **Figure 2.** Whole eye and retinal phenotypes of homozygous and compound heterozygous  
573 mice with human nanophthalmos missense mutations. (A) Pictures of eyes from wild-type  
574 and mutant mice. The eyes of the homozygous and compound heterozygous mutants are  
575 not noticeably smaller than the wild-type eye. (B) Left panel, retinal images; centre panel  
576 sections through the optic nerve; right panel, higher magnification pictures of the retina.  
577 *Tmem98*<sup>A193P/A193P</sup>, *Tmem98*<sup>H196P/H196P</sup> and *Tmem98*<sup>A193P/H196P</sup> retinas all have scattered white  
578 spots (left panel) and folds in the outer nuclear layer and sometimes the inner retinal layers  
579 as well (centre and right panels). Scale bars: 1 mm (A and B, centre panel), 100  $\mu$ M (B, right  
580 panel).

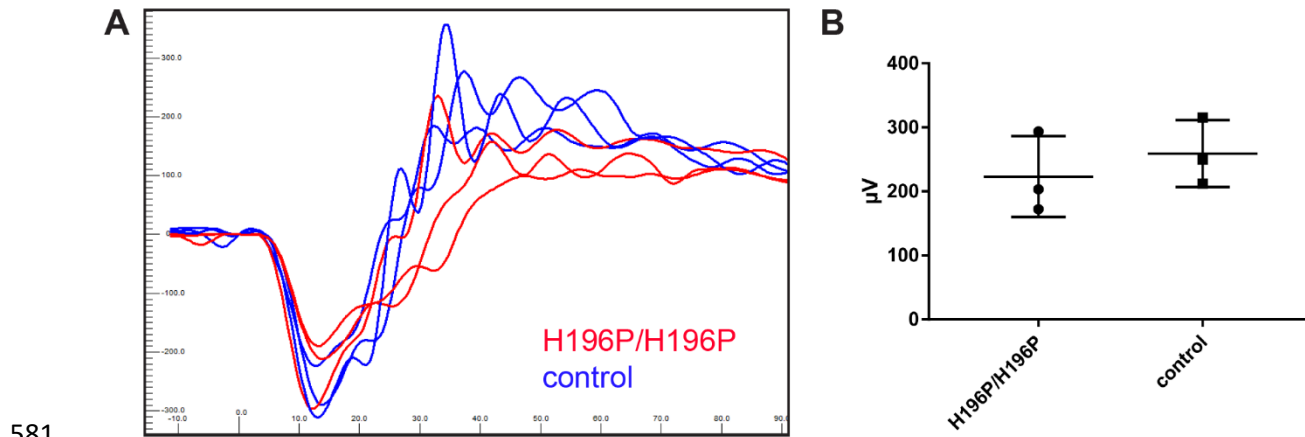

581

582 **Figure 3.** *Tmem98*<sup>H196P/H196P</sup> mice have a normal ERG response. Three *Tmem98*<sup>H196P/H196P</sup>  
583 mice and three control mice (two wild-type and one *Tmem98*<sup>H196P/+</sup>) were tested at 6 months  
584 of age. (A) ERG traces of *Tmem98*<sup>H196P/H196P</sup> mice (red lines), and control mice (blue lines).  
585 Shown are the responses at 3 cd.s/m<sup>2</sup> (average of 4 flashes) for the left eye. (B)  
586 Comparison of a-wave amplitudes, average of left and right eye for each mouse. There is no  
587 significant difference between *Tmem98*<sup>H196P/H196P</sup> and control (unpaired t test with Welch's  
588 correction, P = 0.81).

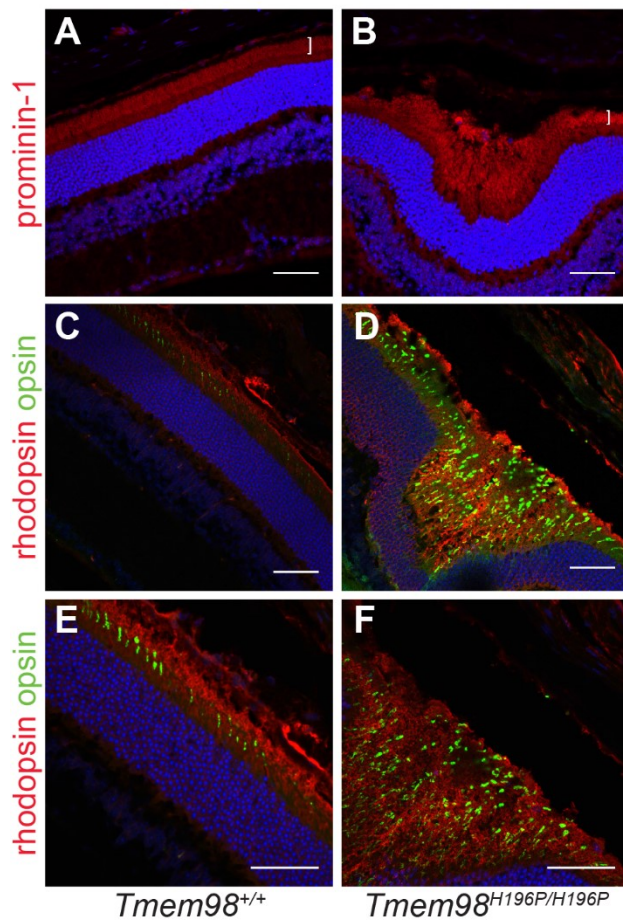

589

590 **Figure 4.** The interiors of the retinal folds found in the *Tmem98*<sup>H196P/H196P</sup> mutant mice are  
591 filled with excess outer segments. Immunostaining of retinal sections from wild-type mice (**A**,  
592 **C** and **E**) and *Tmem98*<sup>H196P/H196P</sup> mice (**B**, **D** and **F**). (**A-B**) Prominin-1 staining (red) shows  
593 that the outer segment layer (white bracket) is expanded in the retinal fold of the mutant (**B**)  
594 compared to wild-type (**A**). (**C-F**) Rhodopsin (red) and opsin (green) staining shows that the  
595 interior of the retinal fold is filled with outer segments. DAPI staining is shown in blue. Scale  
596 bars: 50 μM.

597



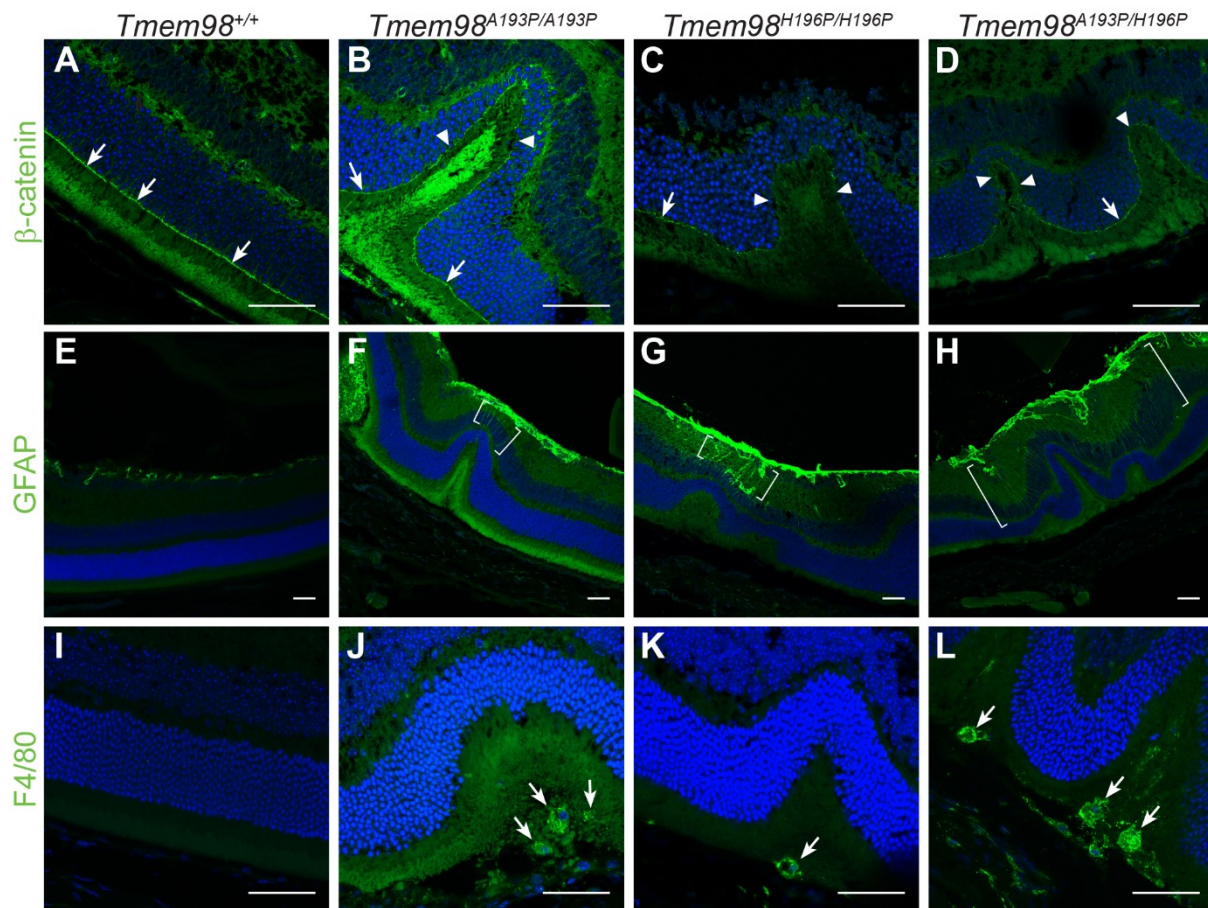

598

599 **Figure 5.** Characterisation of the retinal folds in the *Tmem98* mutant mice. Immunostaining  
600 of retinal sections from wild-type mice (A, E and I), *Tmem98*<sup>A193P/A193P</sup> mice (B, F and J),  
601 *Tmem98*<sup>H196P/H196P</sup> mice (C, G and K), *Tmem98*<sup>A193P/H196P</sup> mice (D, H and L). (A-D)  $\beta$ -catenin  
602 staining (green) shows that the OLM is intact in the wild-type retina and in the areas either  
603 side of folds in the mutant retinas (white arrows) but in the folds of the mutant retinas the  
604 OLM is interrupted (white arrowheads). (E-H) GFAP staining (green) is normal in the wild-  
605 type retina but above the folds in the mutant retinas there is abnormal GFAP staining  
606 extending towards the outer nuclear layer (areas between the white brackets). This indicates  
607 that in the mutants the retina is stressed in the folded regions and that retinal stress is  
608 confined to the folds. (I-L) F4/80 staining (green) reveals that macrophages have infiltrated  
609 into the areas below the folded outer nuclear layer containing excess photoreceptors in the  
610 mutant retinas (white arrows). Staining was not observed outside the folds in the mutant  
611 retinas. DAPI staining is shown in blue. Scale bars: 50  $\mu$ m.

612

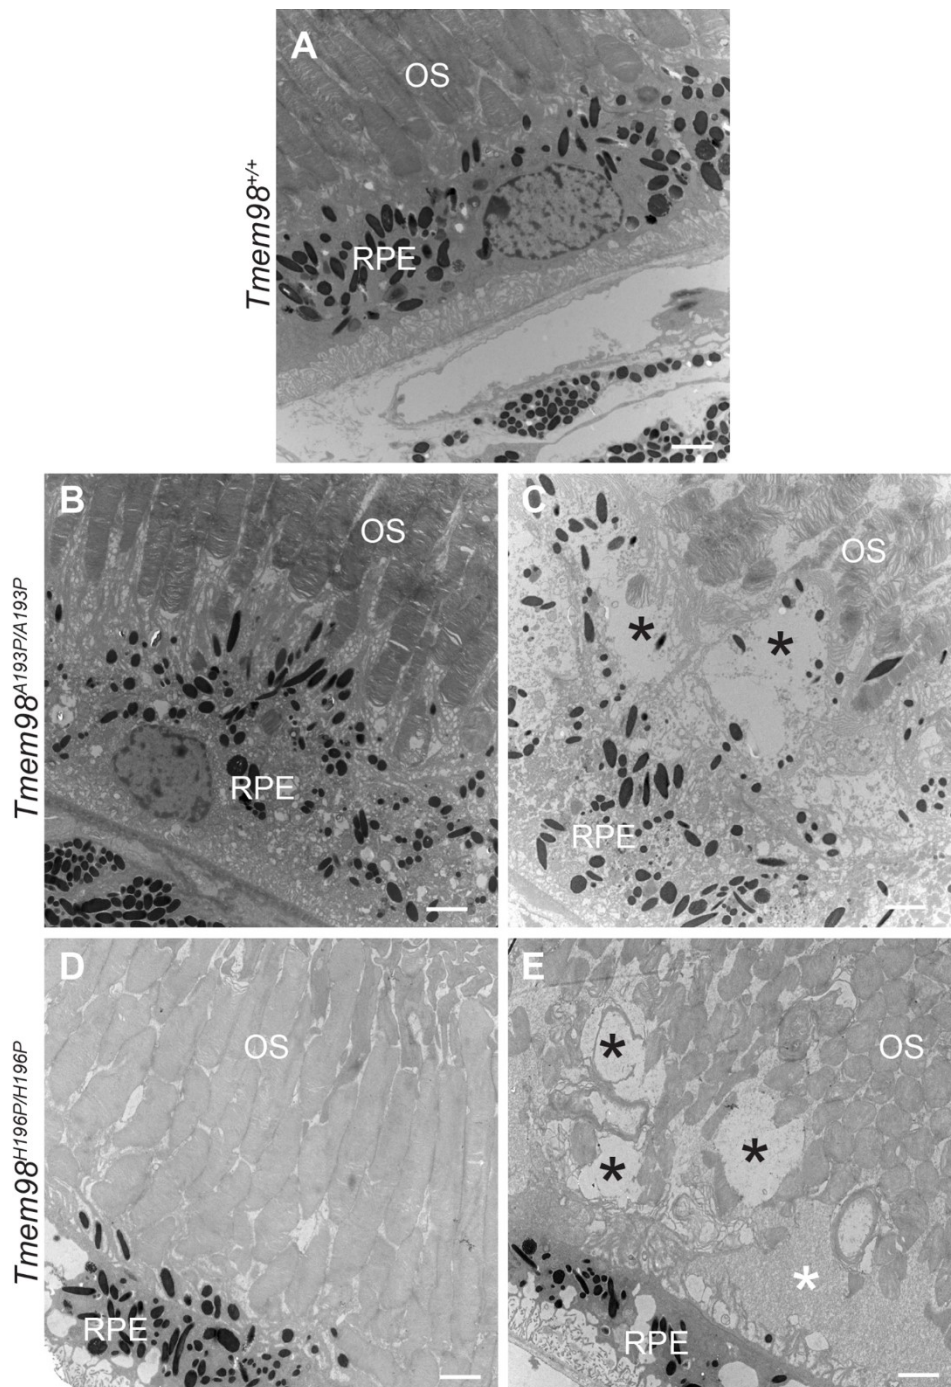

613

614 **Figure 6.** Ultrastructural analysis of the RPE and outer segment boundary. (A) Wild-type  
615 mice are normal. (B and D) In mutant mice from retinal regions with no folds the outer  
616 segments adjacent to the RPE appear normal. (C and E) In retinal areas with folds the outer  
617 segments abutting the RPE appear abnormal and disorganised. Several large vacuoles  
618 (indicated by black asterisks) can be seen. In (E) there is an area containing cellular debris  
619 (indicated by a white asterisk). *Tmem98*<sup>A193P/A193P</sup> (B, C) and *Tmem98*<sup>H196P/H196P</sup> (D, E). OS =  
620 outer segments, RPE = retinal pigment epithelium. Scale bars: 2 μm.
